# Supplementary material for: Enhancing Maize Productivity and Soil Health under Salt Stress through Physiological Adaptation and Metabolic Regulation Using Indigenous Biostimulants
Source: MDPI journal article supplement (doi:10.3390/plants12213703), 2023-10-27
Supplement: s1 [file s1]

**Table S1.** Results of multivariate analysis of variance (MANOVA) test for independent variables including salt stress (SS), arbuscular mycorrhizal fungi (A), plant growth promoting rhizobacteria (R), compost (C), and the interaction between them.

|                               | SS  | R   | A   | C   | SS*R | SS*A | SS*C | A*R | R*C | C*A | C*A*R | SS*A*R | SS*C*A | SS*R*C | SS* C*A*R |
|-------------------------------|-----|-----|-----|-----|------|------|------|-----|-----|-----|-------|--------|--------|--------|-----------|
| MF%                           | **  | NS  | *** | *** | NS   | **   | **   | NS  | NS  | *** | NS    | NS     | **     | NS     | NS        |
| MI%                           | **  | NS  | *** | **  | NS   | **   | NS   | NS  | NS  | **  | NS    | NS     | NS     | NS     | NS        |
| MD%                           | *** | NS  | *** | *** | NS   | ***  | NS   | NS  | NS  | *** | NS    | NS     | NS     | *      | *         |
| SDW                           | **  | NS  | NS  | *** | NS   | NS   | NS   | NS  | NS  | *   | NS    | NS     | NS     | *      | NS        |
| RDW                           | *** | *   | NS  | **  | NS   | NS   | ***  | **  | NS  | *** | NS    | NS     | **     | NS     | NS        |
| LN                            | **  | *** | NS  | *** | NS   | NS   | NS   | NS  | NS  | NS  | NS    | *      | NS     | NS     | NS        |
| SH                            | *** | *   | *** | *   | NS   | *    | NS   | NS  | **  | NS  | *     | NS     | NS     | NS     | NS        |
| RL                            | NS  | *** | **  | **  | NS   | *    | **   | **  | NS  | *   | ***   | NS     | NS     | NS     | NS        |
| Fv/Fm                         | *   | NS  | NS  | NS  | NS   | NS   | NS   | NS  | NS  | NS  | ***   | NS     | NS     | NS     | **        |
| WC                            | *** | NS  | *** | *   | NS   | *    | NS   | **  | NS  | **  | ***   | *      | NS     | NS     | NS        |
| g <sub>s</sub>                | NS  | *** | *** | *** | NS   | NS   | NS   | NS  | NS  | *   | ***   | NS     | NS     | NS     | NS        |
| PPO                           | *** | **  | NS  | *   | NS   | ***  | NS   | *   | NS  | NS  | *     | **     | NS     | NS     | NS        |
| POX                           | **  | *   | NS  | **  | NS   | NS   | NS   | **  | *** | **  | NS    | ***    | NS     | **     | NS        |
| H <sub>2</sub> O <sub>2</sub> | *** | *   | NS  | **  | **   | *    | NS   | NS  | NS  | NS  | **    | ***    | *      | NS     | NS        |
| pH                            | *** | NS  | *   | NS  | *    | NS   | NS   | NS  | NS  | **  | **    | *      | ***    | *      | NS        |
| EC                            | *** | NS  | NS  | NS  | NS   | NS   | NS   | NS  | NS  | *   | NS    | NS     | NS     | *      | NS        |
| AP                            | *   | NS  | *   | *** | NS   | NS   | NS   | NS  | NS  | *   | NS    | NS     | NS     | **     | NS        |
| TOC                           | NS  | NS  | *** | *** | NS   | NS   | ***  | *** | *** | *** | NS    | NS     | **     | NS     | NS        |
| TOM                           | NS  | NS  | *** | *** | NS   | NS   | ***  | *** | *** | *** | NS    | NS     | ***    | NS     | NS        |
| K                             | NS  | **  | NS  | NS  | NS   | ***  | NS   | NS  | *** | *** | NS    | ***    | *      | *      | ***       |
| Ca                            | **  | *** | NS  | *** | ***  | ***  | **   | *** | *** | NS  | ***   | ***    | NS     | ***    | ***       |
| Mg                            | NS  | NS  | *** | NS  | **   | NS   | NS   | NS  | **  | **  | NS    | NS     | NS     | ***    | ***       |
| Fe                            | *** | *** | *** | *** | *    | ***  | ***  | **  | *** | *** | ***   | NS     | *      | ***    | ***       |
| Na                            | *** | *** | *** | *** | **   | NS   | ***  | NS  | NS  | NS  | ***   | ***    | ***    | **     | NS        |
| Glom                          | **  | NS  | **  | *** | NS   | NS   | NS   | NS  | NS  | NS  | NS    | NS     | NS     | NS     | NS        |

MF: myorrhization frequency; MI: mycorrhization intensity; MD: mycorrhization dependency; SDW: shoot dry weight; RDW: root dry weight; LN: leaf number; SH: shoot height; RL: roots length; Fv/Fm: chlorophyll fluorescence; WC: water content; g<sub>s</sub>: stomatal conductance; PPO: polyphenol oxidase activity; POX: peroxidase activity; H<sub>2</sub>O<sub>2</sub>: hydrogen peroxide; pH: hydrogen potential; EC: electrical conductivity; AP: available phosphorus; TOC: total organic carbon; TOM: total organic matter; K: potassium; Ca: calcium; Mg: magnesium; Fe: iron; Na: sodium; Glom: Glomalin; SS: salt stress; NS: not significant; \*:  $p < 0.05$ ; \*\*:  $p < 0.01$  and \*\*\*:  $p < 0.001$ .
