# Supplementary figures and images for: Enhancing Maize Productivity and Soil Health under Salt Stress through Physiological Adaptation and Metabolic Regulation Using Indigenous Biostimulants
Source: MDPI journal article supplement (doi:10.3390/plants12213703), 2023-10-27

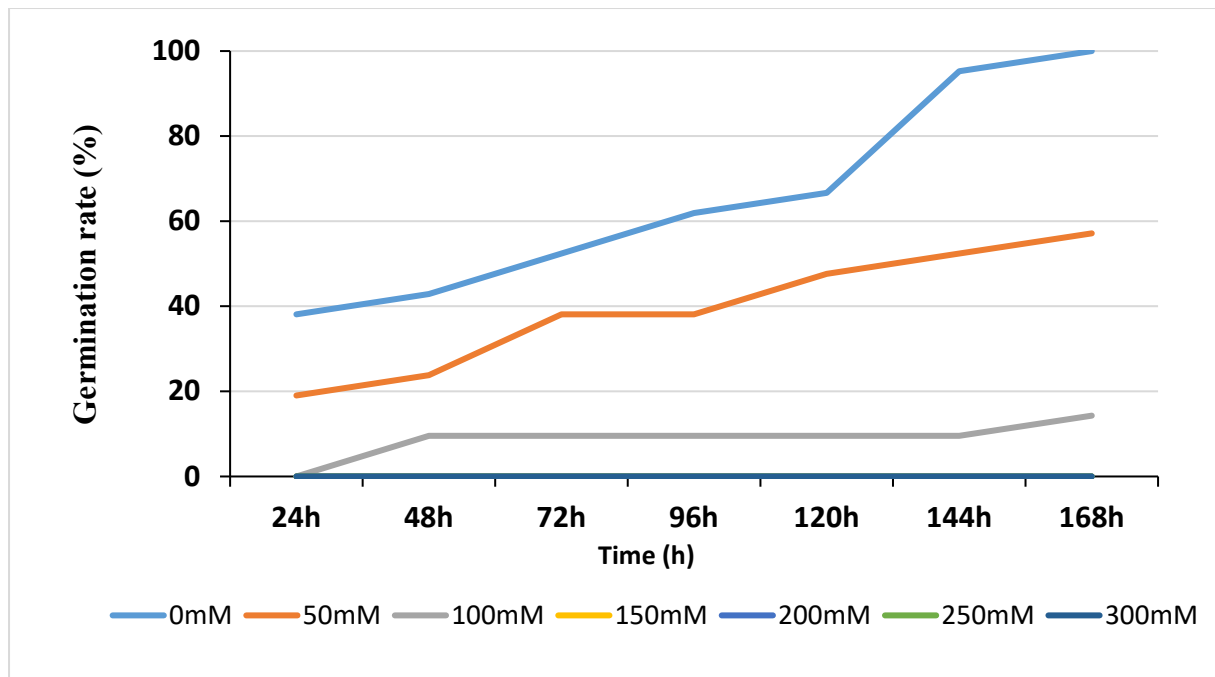

**Figure S1.** Germination rate of sweet corn seeds at varying NaCl concentrations.

Supplement: s1 [file s1]
